# Supplementary material for: Evolution of Fluconazole-Resistant Candida albicans Strains by Drug-Induced Mating Competence and Parasexual Recombination
Source: PubMed Central journal article supplement (PMC6428756; doi:10.1128/mbio.02740-18), 2019-02-05
Supplement: mBio.02740-18-sf001.pdf [file mBio.02740-18-sf001.pdf]

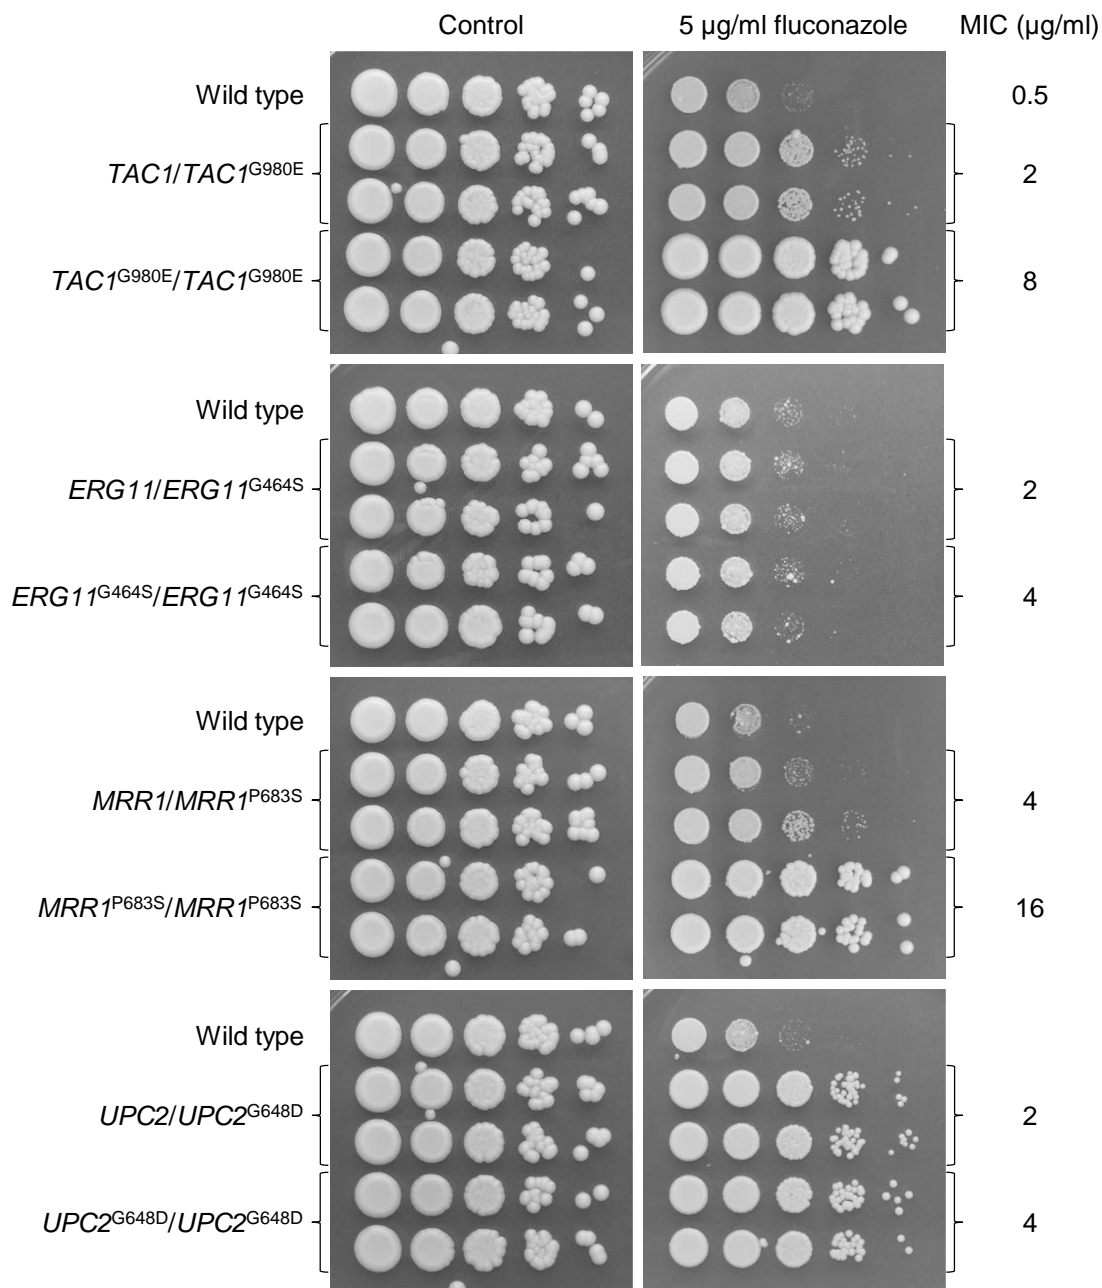

**Fig S1. Growth of strains with heterozygous and homozygous resistance mutations on agar plates containing fluconazole.** Serial 10-fold dilutions of the strains were spotted on YPD agar plates without or with 5  $\mu\text{g/ml}$  fluconazole and incubated for 2 days at 30°C. The following strains were used: SC5314 (wild type), SCTAC1R32A and -B (*TAC1/TAC1*<sup>G980E</sup>), SCTAC1R34A and -B (*TAC1*<sup>G980E</sup>/*TAC1*<sup>G980E</sup>), SCERG11R32A and -B (*ERG11/ERG11*<sup>G464S</sup>), SCERG11R34A and -B (*ERG11*<sup>G464S</sup>/*ERG11*<sup>G464S</sup>), SCMRR1R32A and -B (*MRR1/MRR1*<sup>P683S</sup>), SCMRR1R34A and -B (*MRR1*<sup>P683S</sup>/*MRR1*<sup>P683S</sup>), SCUPC2R12A and -B (*UPC2/UPC2*<sup>G648D</sup>), SCUPC2R14A and -B (*UPC2*<sup>G648D</sup>/*UPC2*<sup>G648D</sup>). The MICs of fluconazole for each strain, as determined in a broth microdilution assay, are also given.
