# Supplementary material for: Evolution of Fluconazole-Resistant Candida albicans Strains by Drug-Induced Mating Competence and Parasexual Recombination
Source: PubMed Central journal article supplement (PMC6428756; doi:10.1128/mbio.02740-18), 2019-02-05
Supplement: mBio.02740-18-sf002.pdf [file mBio.02740-18-sf002.pdf]

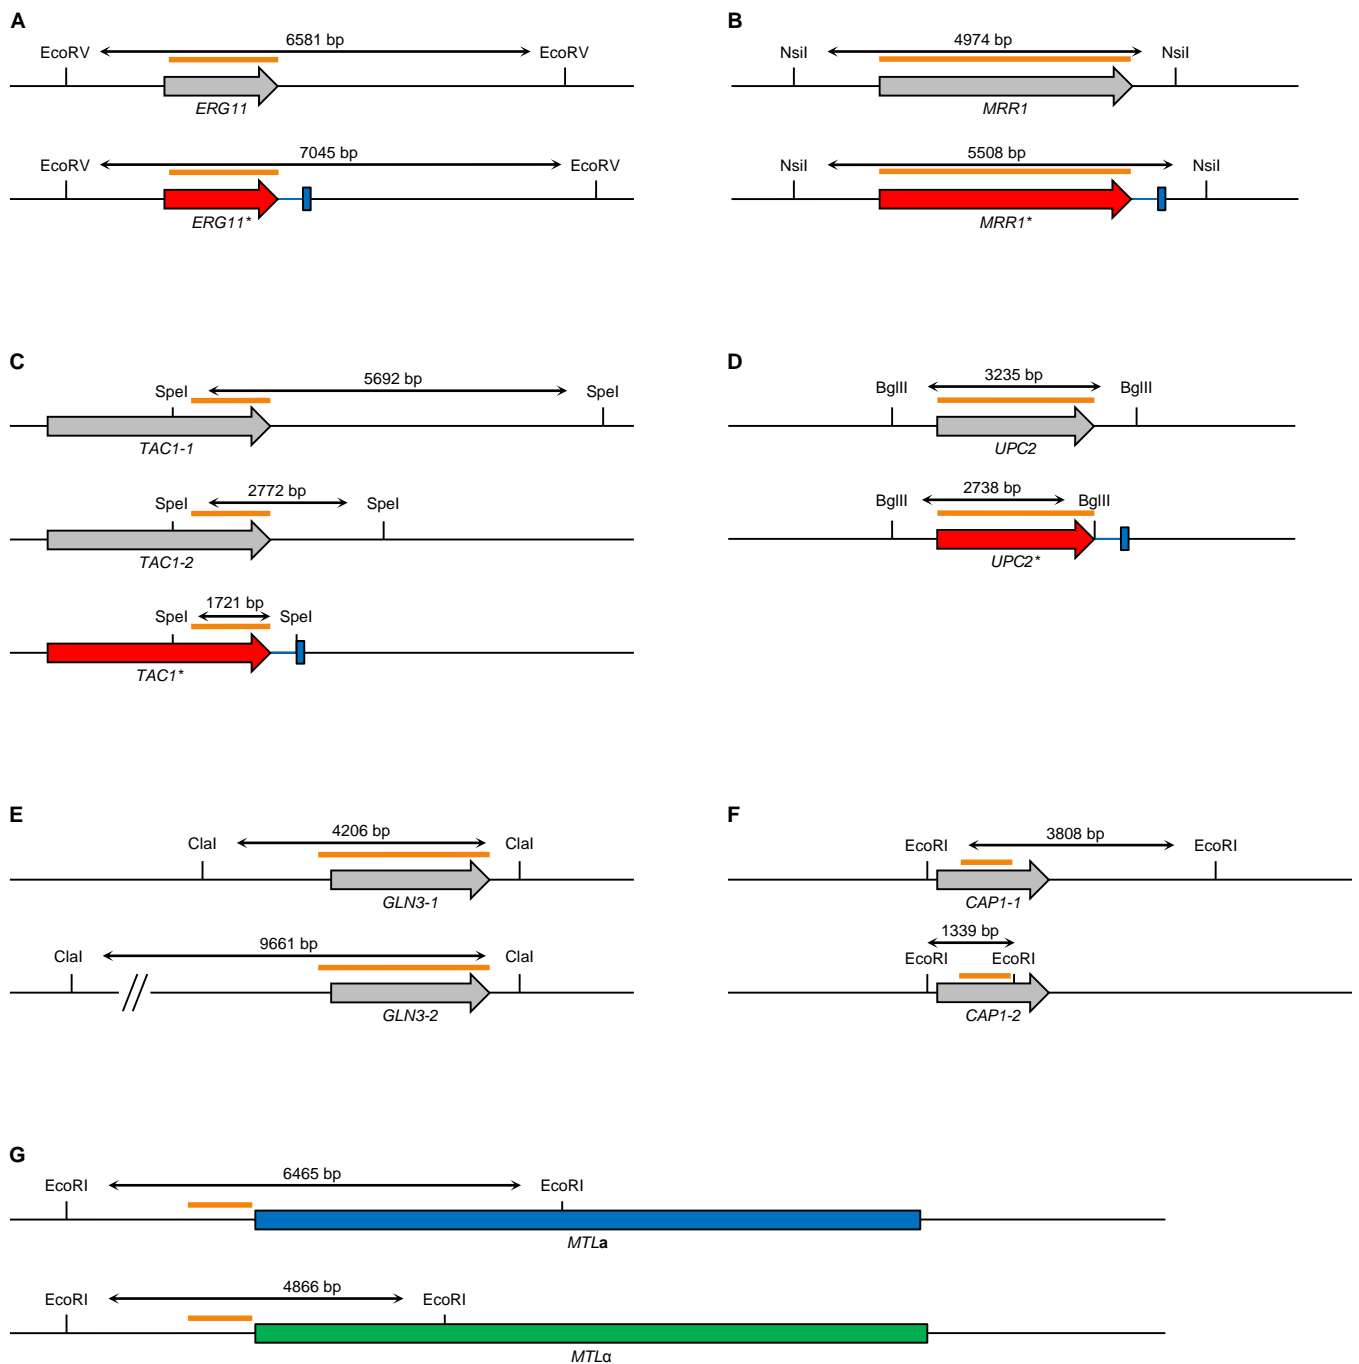

**Fig S2. Discrimination between wild-type and mutated *ERG11*, *MRR1*, *TAC1*, and *UPC2* alleles and between the polymorphic wild-type *GLN3*, *CAP1*, and *MTL* alleles in derivatives of strain SC5314 by Southern hybridization.** Relevant restriction sites are indicated and the sizes of fragments hybridizing to specific probes (orange bars) are given. The blue line and box behind *ERG11\**, *MRR1\**, *TAC1\**, and *UPC2\** indicate the *ACT1* transcription termination sequence and the *FRT* site, respectively, that were introduced together with the mutated alleles (highlighted in red) during strain construction. The blue and green bars in (G) represent the region that differs between the *MTL $\alpha$*  and *MTL $\alpha$*  loci.
