# Supplementary material for: Evolution of Fluconazole-Resistant Candida albicans Strains by Drug-Induced Mating Competence and Parasexual Recombination
Source: PubMed Central journal article supplement (PMC6428756; doi:10.1128/mbio.02740-18), 2019-02-05
Supplement: mBio.02740-18-sf003.pdf [file mBio.02740-18-sf003.pdf]

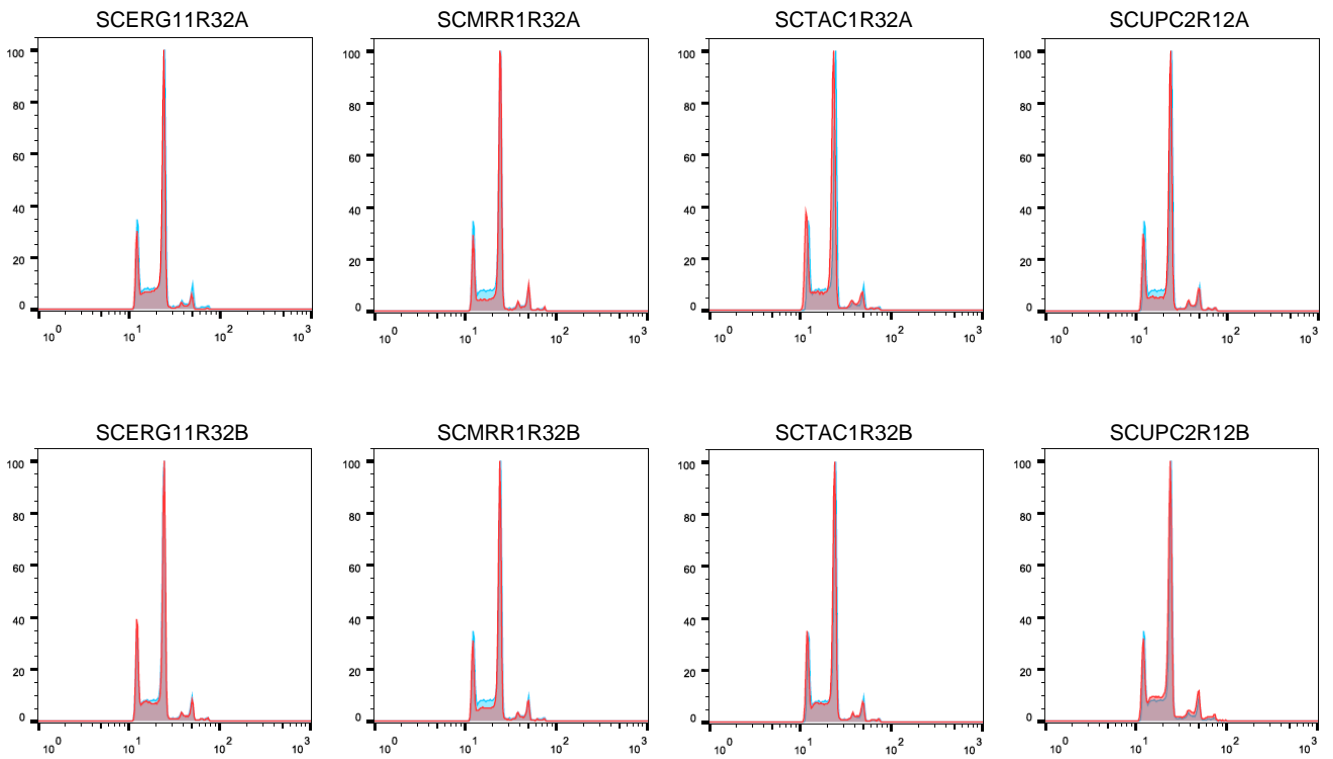

**Fig S3. Ploidy analysis of *C. albicans* strains containing different fluconazole resistance mutations.** The plots show the results of flow cytometric measurements of the DNA content of strains SCERG11R32A and -B (*ERG11/ERG11<sup>G464S</sup>*), SCMRR1R32A and -B (*MRR1/MRR1<sup>P683S</sup>*), SCTAC1R32A and -B (*TAC1/TAC1<sup>G980E</sup>*), and SCUPC2R12A and -B (*UPC2/UPC2<sup>G648D</sup>*). The profile of the diploid reference strain SC5314 is shown in blue, and the profiles of all other strains are shown in red.
