# Supplementary material for: Evolution of Fluconazole-Resistant Candida albicans Strains by Drug-Induced Mating Competence and Parasexual Recombination
Source: PubMed Central journal article supplement (PMC6428756; doi:10.1128/mbio.02740-18), 2019-02-05
Supplement: mBio.02740-18-sf007.pdf [file mBio.02740-18-sf007.pdf]

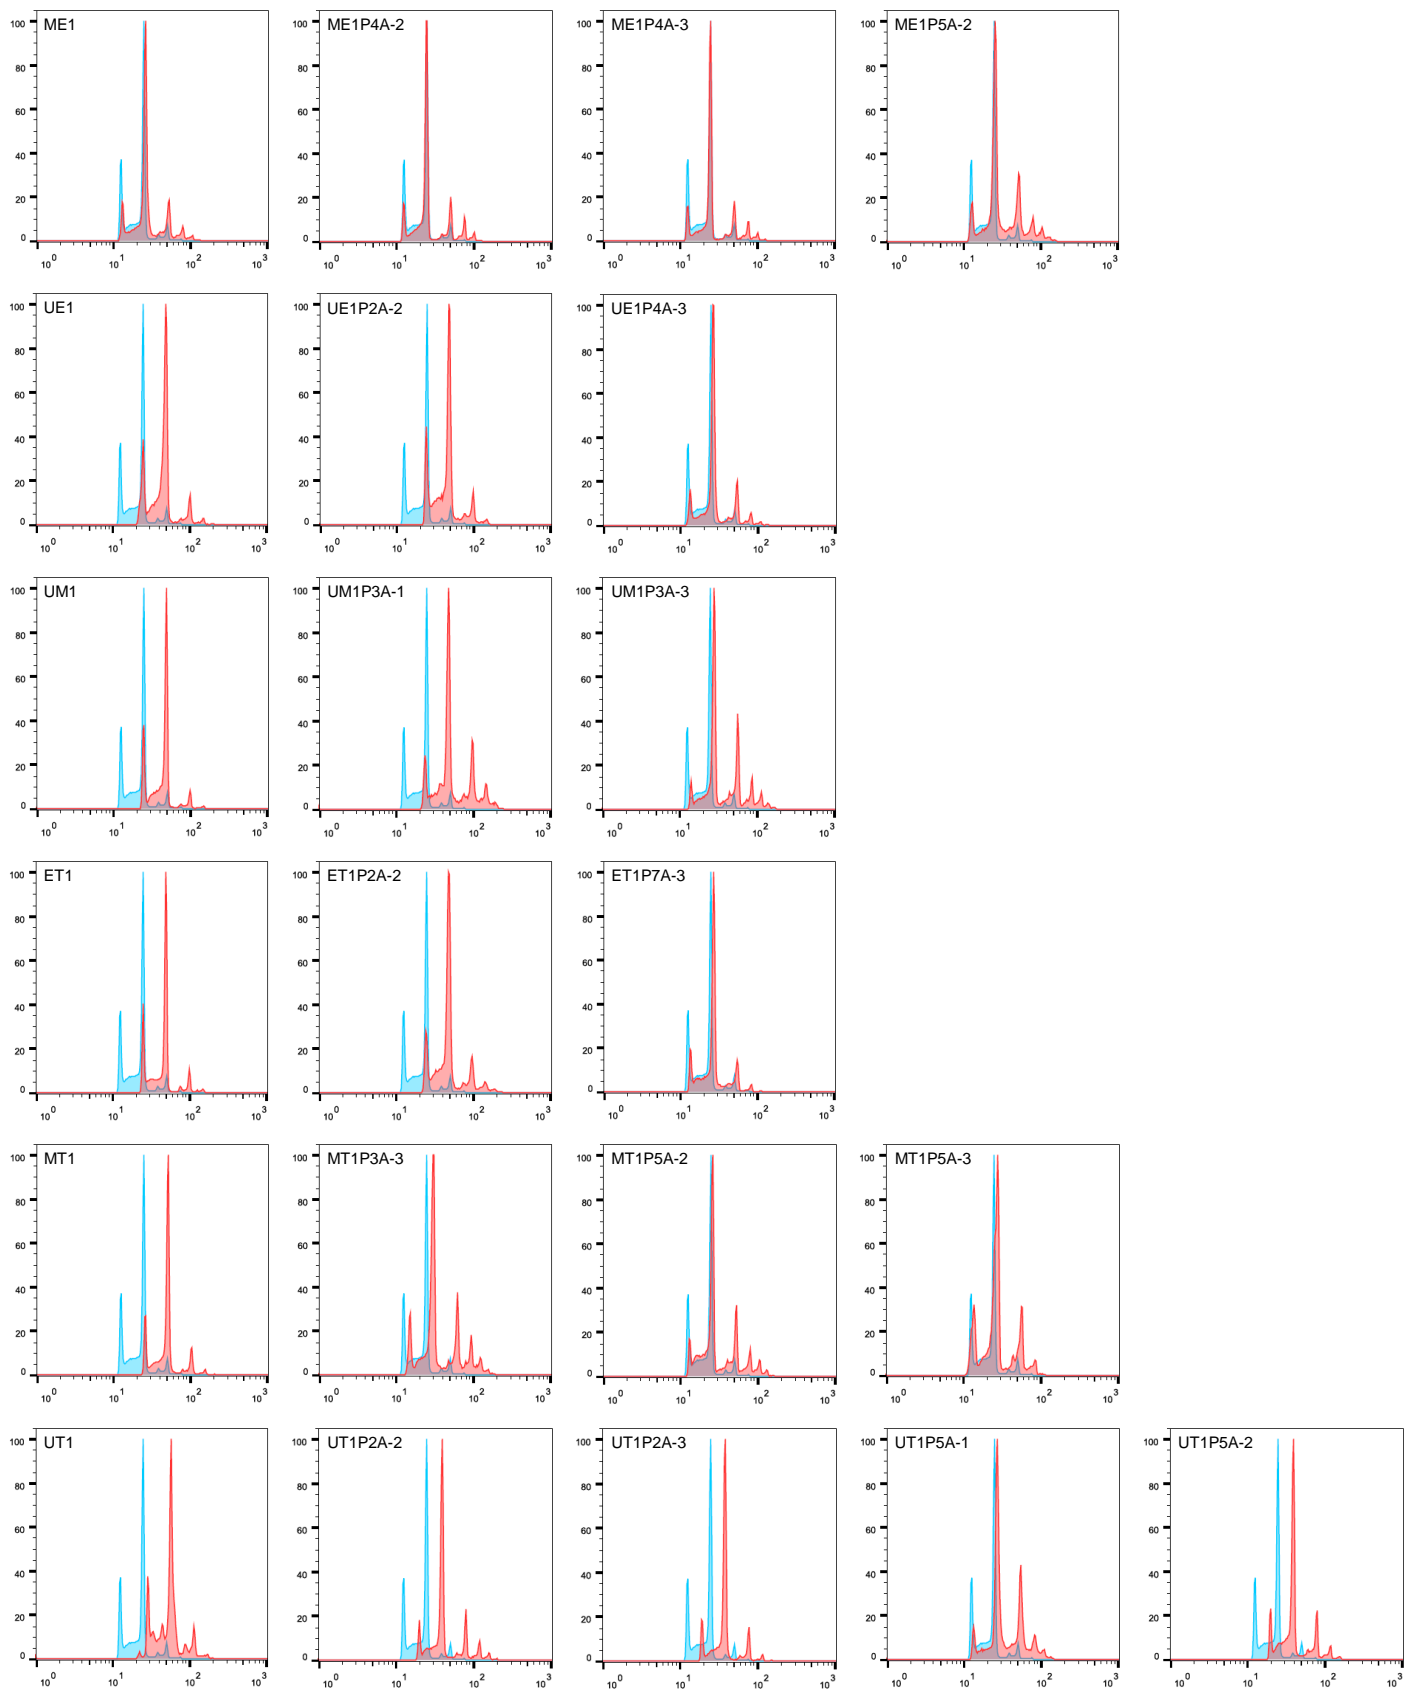

**Fig S7. Ploidy analysis of mating product progeny.** The plots show the results of flow cytometric measurements of the DNA content of the original mating products from reverse crosses of those presented in Fig 6 and derivatives with increased fluconazole resistance after passage in the presence of the drug. The profile of the diploid reference strain SC5314 is shown in blue in each experiment.
